# Supplementary material for: Convergent evolution of body color between sympatric freshwater fishes via different visual sensory evolution
Source: PubMed Central journal article supplement (PMC6580282; doi:10.1002/ece3.5211), 2019-04-26
Supplement: ECE3-9-6389-s001.pdf [file ECE3-9-6389-s001.pdf]

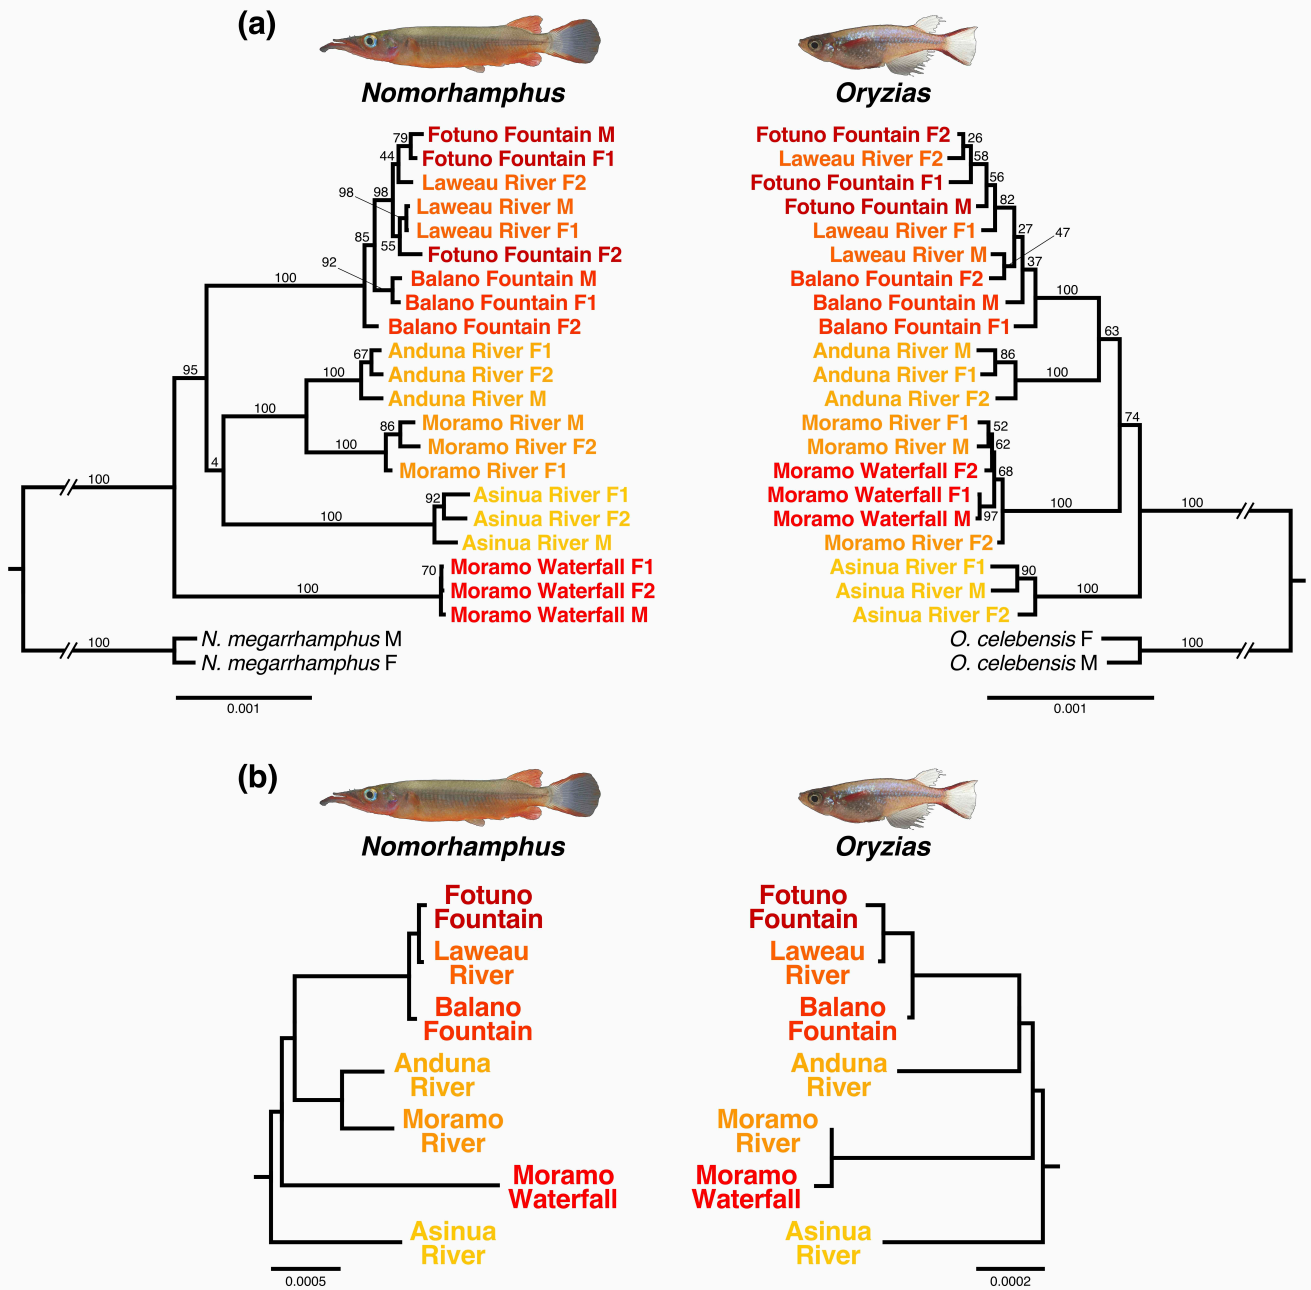

**Figure S1** (a) Maximum-likelihood nuclear phylogeny of *Nomorhamphus* and *Oryzias* reconstructed from the concatenating 272 and 148 transcripts, respectively. The numbers on branches show the maximum-likelihood bootstrap values. (b) Neighbor-joining population-averaged tree of *Nomorhamphus* and *Oryzias* based on the  $d_A$  values calculated from the 272 and 148 transcripts, respectively.
