# Supplementary material for: Convergent evolution of body color between sympatric freshwater fishes via different visual sensory evolution
Source: PubMed Central journal article supplement (PMC6580282; doi:10.1002/ece3.5211), 2019-04-26
Supplement: ECE3-9-6389-s002.pdf [file ECE3-9-6389-s002.pdf]

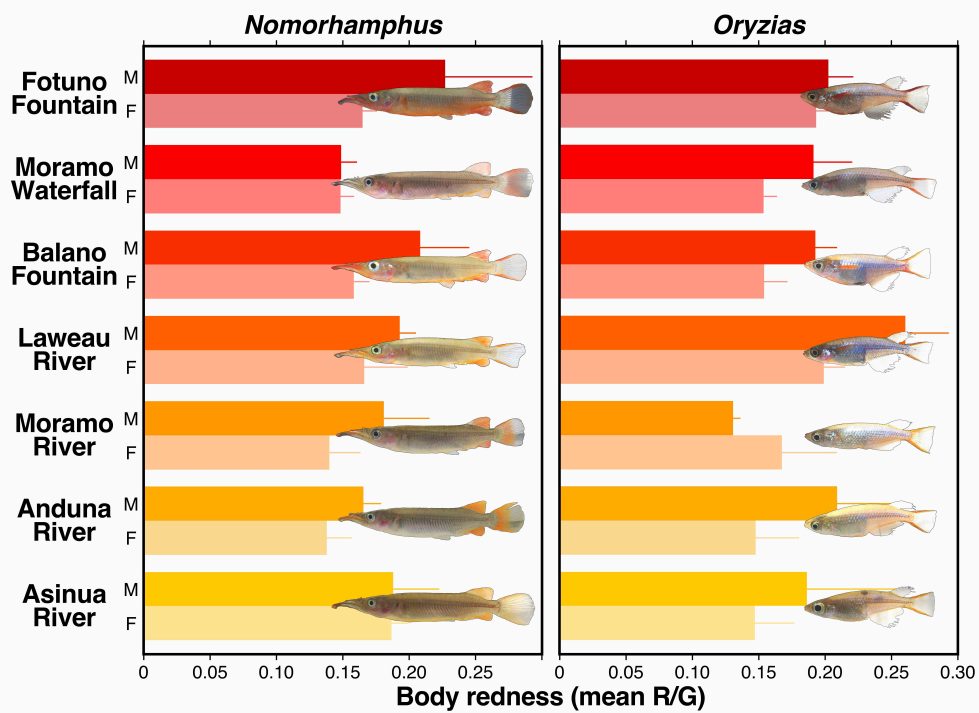

**Figure S2** Body redness measured as the mean redness/greenness (R/G) of the wild individuals of *Nomorhamphus* and *Oryzias*.
