# Supplementary material for: Convergent evolution of body color between sympatric freshwater fishes via different visual sensory evolution
Source: PubMed Central journal article supplement (PMC6580282; doi:10.1002/ece3.5211), 2019-04-26
Supplement: ECE3-9-6389-s004.pdf [file ECE3-9-6389-s004.pdf]

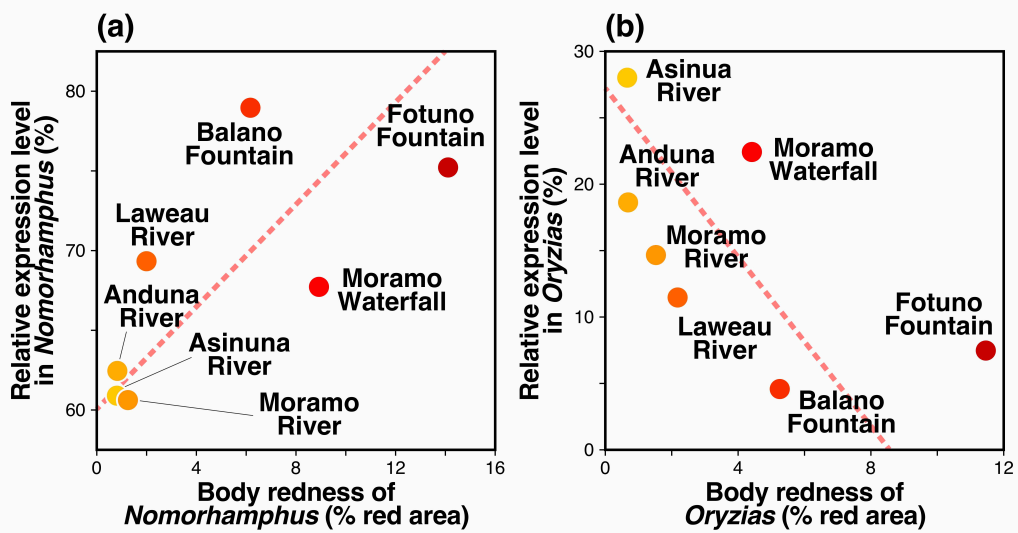

**Figure S4** Correlation between the mean ratio of the red areas to the total body area in males and the population-averaged LWS expression level in (a) *Nomorhamphus* and (b) *Oryzias*.
