# Supplementary material for: Convergent evolution of body color between sympatric freshwater fishes via different visual sensory evolution
Source: PubMed Central journal article supplement (PMC6580282; doi:10.1002/ece3.5211), 2019-04-26
Supplement: ECE3-9-6389-s005.pdf [file ECE3-9-6389-s005.pdf]

**Fotuno Fountain**

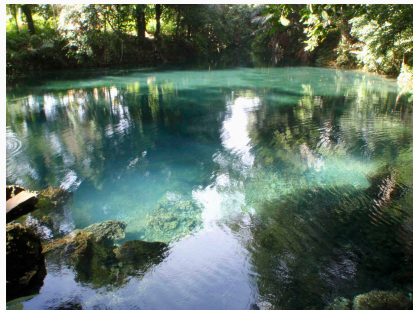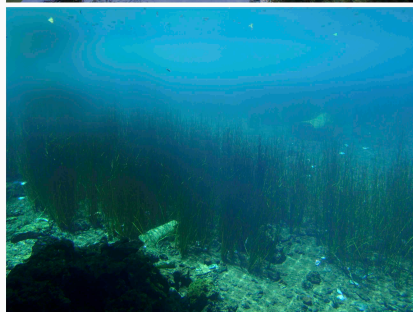

**Asinua River**

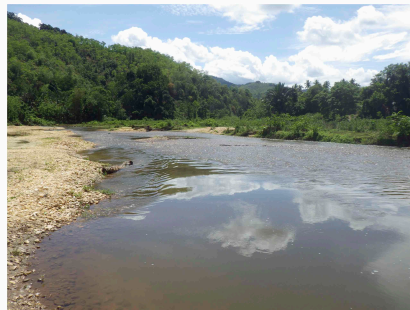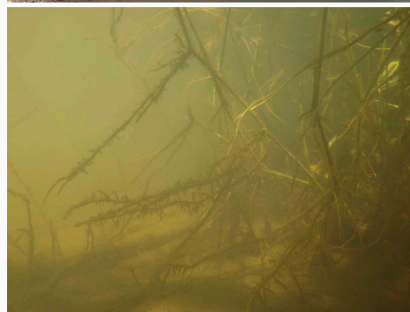

**Figure S5** Underwater photography of Fotuno Fountain and Asinua River.
